# Supplementary material for: Identification of NRAS Downstream Genes with CRISPR Activation Screening
Source: Biology (Basel). 2022 Oct 23;11(11):1551. doi: 10.3390/biology11111551 (PMC9687188; doi:10.3390/biology11111551)
Supplement: Supplementary file 1 [file biology-11-01551-s001.zip › biology-1904269-supplementary.pdf]

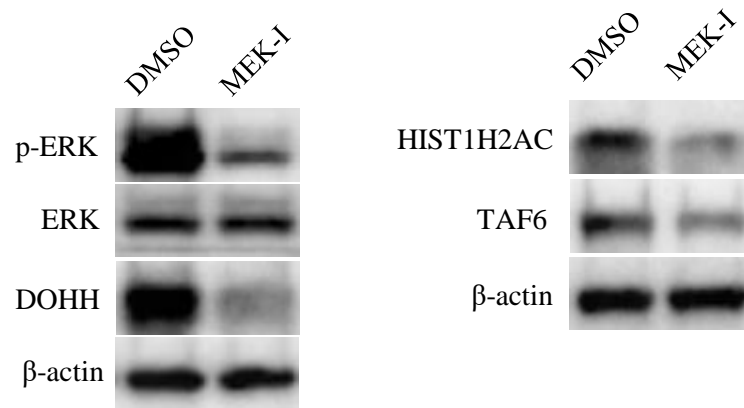

**Figure S1. Analysis of DOHH, HIST1H2AC, and TAF6 expression in THP-1 B11 cells following MEK inhibitor treatment.** Expression of ERK, phosphorylated ERK, DOHH, HIST1H2AC, and TAF6 were analyzed by WB for THP-1 parental cell lines treated with DMSO or MEK-I. The two blot images were performed at different time points using the same cells.

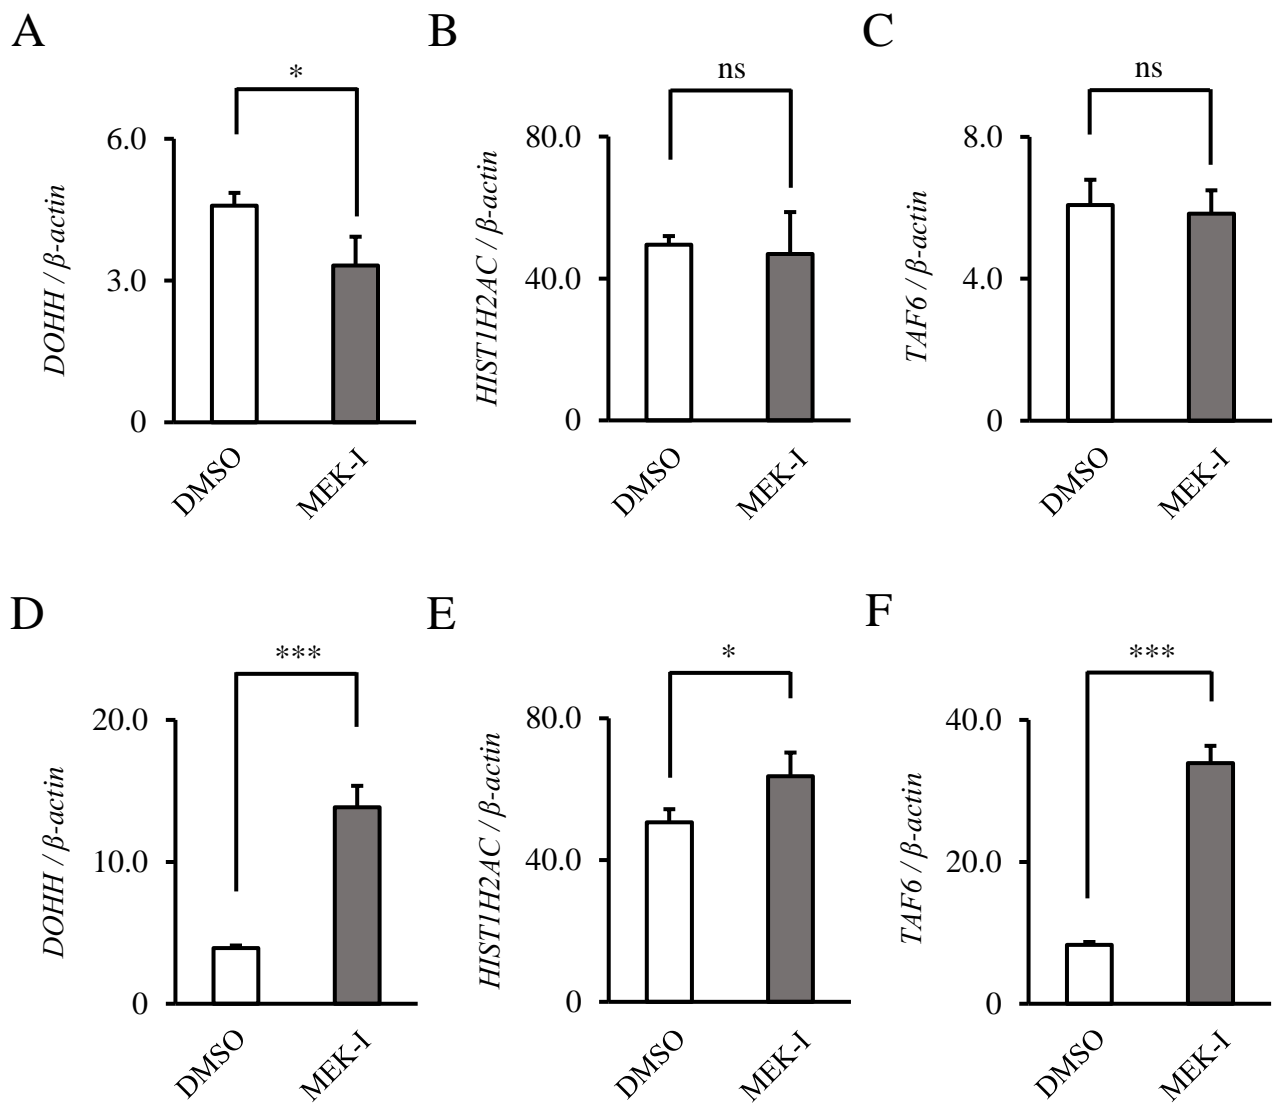

**Figure S2. DOHH, HIST1H2AC, and TAF6 expression with MEK-I treatment in HL-60 cell lines harboring NRAS<sup>Q61L</sup> mutation and MIA PaCa-2 harboring KRAS<sup>G12C</sup> mutations.** (A–C) HL-60 cells were treated with MEK-I (PD184161, 5  $\mu$ M) for 48 h. RT-qPCR was analyzed after reverse transcription of RNA extracted from collected cells. Relative mRNA expression of *DOHH*, *HIST1H2AC*, and *TAF6* was shown as delta-delta Ct values normalized by  $\beta$ -actin mRNA (n=3). (D–F) MIA PaCa-2 were treated with MEK-I (PD184161, 10  $\mu$ M) for 48h and similarly analyzed by RT-qPCR (n=3). Data are expressed as mean $\pm$ SD. Statistical significance was determined using an unpaired *t*-test. \**p* < 0.05, \*\**p* < 0.01, \*\*\**p* < 0.001. ns: no significance.

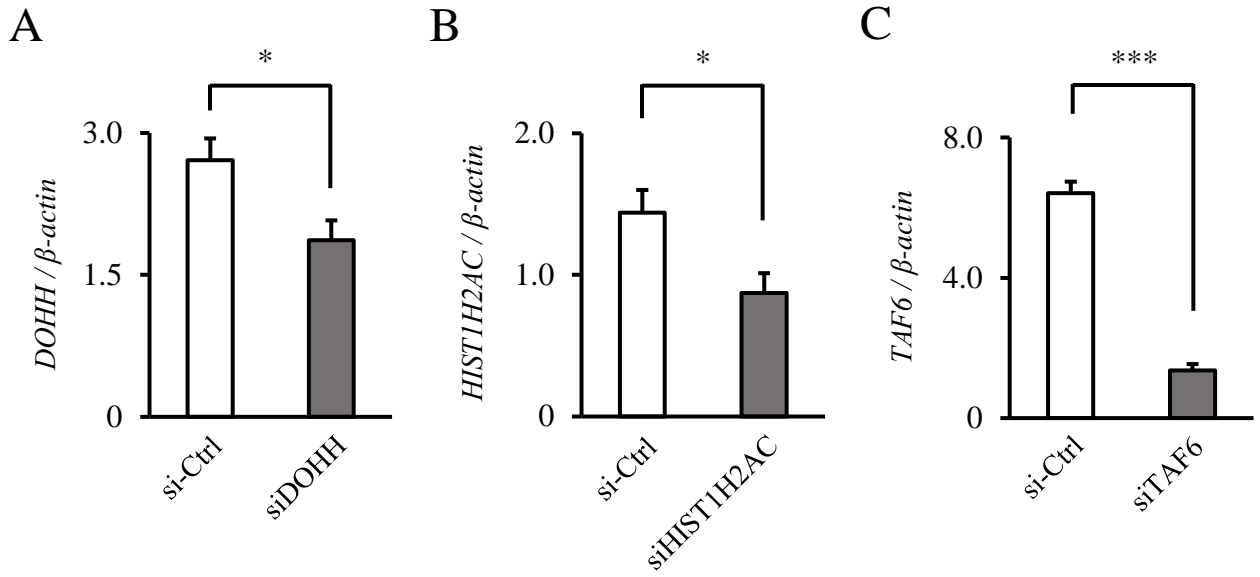

**Figure S3. Suppression of mRNA expression by siRNA knockdown was confirmed by RT-qPCR.** The THP-1 parental cell lines ( $1.0 \times 10^6$  cells/sample) were transfected with siRNA using Amaxa Nucleofector II (solution V, program V-001), and the cells were retrieved after 24 h. siRNAs targeting different genes in *DOHH* (A), *HIST1H2AC* (B), and *TAF6* (C) were used. RT-qPCR was analyzed after reverse transcription of RNA extracted from collected cells. Relative mRNA expression was shown as delta-delta Ct values normalized by  $\beta$ -actin mRNA ( $n=3$ ). si-Ctrl was used as a negative control. Data are expressed as mean  $\pm$  SD. Statistical significance was determined using an unpaired *t*-test. \* $p < 0.05$ , \*\* $p < 0.01$ , \*\*\* $p < 0.001$ .
